# Supplementary material
Source: PubMed Central journal article supplement (PMC6701181)
Supplement: NIHMS1042587-supplement-Supp.pdf [file NIHMS1042587-supplement-Supp.pdf]

## SUPPLEMENTAL MATERIAL

Supplemental table 1. Details of the EAB, DSMB and SAB

| Board                        | Details                                                                                                                                                                                                                                                                                                                                  |
|------------------------------|------------------------------------------------------------------------------------------------------------------------------------------------------------------------------------------------------------------------------------------------------------------------------------------------------------------------------------------|
| Endpoint Adjudication Board  | The EAB consisted of 9 Adjudicators (4 hematologists, 2 emergency medicine physicians, 2 trauma surgeons, and 1 gastroenterologist). A lack of conflict of interest was ascertained.                                                                                                                                                     |
| Safety Adjudication Board    | The SAB consisted of 3 voting members and 1 physician/moderator (non-voting member). The 3 voting members had experience in coagulation, anticoagulation treatments and their reversal, and cardiology. The physician moderator had experience in pharmacovigilance and risk management. A lack of conflict of interest was ascertained. |
| Data Safety Monitoring Board | The DSMB consisted of 4 voting expert members (3 physicians/1 biostatistician). The 3 physician members had experience in anticoagulant therapy and their reversal; the independent biostatistician had experience in clinical trials. All of them had prior DSMB experience. A lack of conflict of interest was ascertained.            |

Supplemental table 2. Secondary endpoints

| Endpoint                                                                                                           | Timeframe                                              |
|--------------------------------------------------------------------------------------------------------------------|--------------------------------------------------------|
| Plasma levels of factors II, VII, IX, X and of proteins C and S                                                    | 24 hours from start of infusion                        |
| Hemostatic efficacy of 4F-PCC and plasma for visible and musculoskeletal non-visible bleeding                      | 3 and 6 hours from start of infusion                   |
| Time from start of infusion until INR correction                                                                   | -                                                      |
| Time from randomization until INR correction                                                                       | -                                                      |
| Total number of packed red blood cell transfusions and the proportion of patients with 1 or more PRBC transfusions | 24 hours from start of infusion                        |
| Use of non-study-prescribed blood products and/or hemostatic agents                                                | From randomization until 24 hours after infusion start |
| All-cause mortality                                                                                                | 45 days after treatment                                |
| Safety and tolerability of 4F-PCC and plasma                                                                       | -                                                      |

Supplemental table 3. Primary rating of hemostatic efficacy: definitions for assessment

| Rating                           | Definition                                                                                                                      |                                                                                                                                                                                                                                                                                                                                                                                                                                                                                                                                                                                                                                                                                                                                                                                                                                                                                                             |
|----------------------------------|---------------------------------------------------------------------------------------------------------------------------------|-------------------------------------------------------------------------------------------------------------------------------------------------------------------------------------------------------------------------------------------------------------------------------------------------------------------------------------------------------------------------------------------------------------------------------------------------------------------------------------------------------------------------------------------------------------------------------------------------------------------------------------------------------------------------------------------------------------------------------------------------------------------------------------------------------------------------------------------------------------------------------------------------------------|
|                                  | Visible bleeding                                                                                                                | Non-visible bleeding                                                                                                                                                                                                                                                                                                                                                                                                                                                                                                                                                                                                                                                                                                                                                                                                                                                                                        |
| <b>Excellent*</b><br>(Effective) | Cessation of bleeding $\leq 1$ hour after the end of infusion <u>and</u> no additional coagulation intervention required        | <ol style="list-style-type: none"> <li>Musculoskeletal bleeding: pain relief <u>or</u> no increase in swelling <u>or</u> unequivocal improvement in objective signs of bleeding <math>\leq 1</math> hour after the end of infusion; <u>and</u> the condition has not deteriorated during the 24-hour period</li> <li>ICH: <math>\leq 20\%</math> increase in hematoma volume compared to baseline on repeat CT scan performed at the 3- and 24-hour time point</li> <li>Non-visible bleeding that is not described above (e.g. GI bleeding): <math>\leq 10\%</math> decrease in both Hb/Hct<sup>†</sup> at 24 hours<sup>‡</sup> compared to baseline (initial correction of decrease in Hb with PRBCs, with a transfusion trigger of a Hb <math>\leq 8 \pm 1</math> g/dL [i.e. transfuse PRBCs if the Hb <math>\leq 8 \pm 1</math> g/dL])</li> </ol>                                                        |
| <b>Good§</b><br>(Effective)      | Cessation of bleeding $> 1$ and $\leq 4$ hours after end of infusion <u>and</u> no additional coagulation intervention required | <ol style="list-style-type: none"> <li>Musculoskeletal bleeding: Pain relief <u>or</u> no increase in swelling <u>or</u> unequivocal improvement in objective signs of bleeding <math>&gt; 1</math> and <math>\leq 4</math> hours after the end of infusion; <u>and</u> the condition has not deteriorated during the 24-hour period</li> <li>ICH: <math>&gt; 20\%</math>, but <math>\leq 35\%</math> increase in hematoma volume compared to baseline on a repeat CT scan performed at the 24-hour time point</li> <li>Non-visible bleeding that is not described above: <math>&gt; 10</math> to <math>\leq 20\%</math> decrease in both Hb/Hct<sup>†</sup> at 24 hours<sup>‡</sup> compared with baseline (initial correction of decrease in Hb with PRBCs, with a transfusion trigger of a Hb <math>\leq 8 \pm 1</math> g/dL [i.e. transfuse PRBCs if the Hb <math>\leq 8 \pm 1</math> g/dL])</li> </ol> |

|                                                              |                                                                                                                                                                                           |                                                                                                                                                                                                                                                                                                                                                                                                                                                                                                                                                                                                                                                                                |
|--------------------------------------------------------------|-------------------------------------------------------------------------------------------------------------------------------------------------------------------------------------------|--------------------------------------------------------------------------------------------------------------------------------------------------------------------------------------------------------------------------------------------------------------------------------------------------------------------------------------------------------------------------------------------------------------------------------------------------------------------------------------------------------------------------------------------------------------------------------------------------------------------------------------------------------------------------------|
| <b>Poor/None<sup>  </sup></b><br><br>(Non-<br><br>effective) | Cessation of bleeding >4 hours after end of the infusion, <u>and/or</u> additional coagulation intervention required (e.g. plasma, whole blood cell pack, or coagulation factor products) | <ol style="list-style-type: none"> <li>1. Musculoskeletal bleeding: no improvement by 4 hours after the end of infusion <u>and/or</u> the condition has deteriorated during the 24-hour period</li> <li>2. ICH: &gt;35% increase in hematoma volume compared to baseline on repeat CT scan performed at the 24 hour time point</li> <li>3. Non-visible bleeding that is not listed above: &gt;20% decrease in both Hb/Hct at 24 hours<sup>‡</sup> compared to baseline (initial correction of decrease in hemoglobin with PRBCs, with a transfusion trigger of a Hb <math>\leq 8 \pm 1</math> g/dL [i.e. transfuse PRBCs if the Hb <math>\leq 8 \pm 1</math> g/dL])</li> </ol> |
|--------------------------------------------------------------|-------------------------------------------------------------------------------------------------------------------------------------------------------------------------------------------|--------------------------------------------------------------------------------------------------------------------------------------------------------------------------------------------------------------------------------------------------------------------------------------------------------------------------------------------------------------------------------------------------------------------------------------------------------------------------------------------------------------------------------------------------------------------------------------------------------------------------------------------------------------------------------|

Any additional diagnostic data for a particular bleeding site, e.g. nasogastric tube, ultrasound, GI endoscope, or CT scans, were taken into account for the overall assessment. Pain, swelling and signs of bleeding were considered to be typical symptoms in cases of musculoskeletal bleeding and were expected to be present at baseline. Any uncontrolled bleeding that did not respond to 4F-PCC or plasma and was related to the underlying disease was taken into account for the overall assessment.

CT, computed tomography; GI, gastrointestinal; Hb, hemoglobin; Hct, hematocrit; ICH, intracranial hemorrhage; PRBCs, packed red blood cells

\*For all types of bleeding: no additional plasma, blood products (whole blood products not including PRBCs) and/or coagulation factor products required after initial treatment with study drug; <sup>†</sup>The smallest percentage decrease in Hb or Hct should be used to determine the efficacy rating of excellent, good or poor/none; <sup>‡</sup>Assumption for the 24-hour adjusted Hb/Hct calculation: for each unit of PRBC transfusion there is generally an increase of 1 g/dL in Hb or 3% increase in Hct; <sup>§</sup>For all types of bleeding: no more than two additional units of plasma or blood products and/or coagulation factor products required after initial treatment with study drug; <sup>||</sup>For all types of bleeding: more than two additional units of plasma, blood products and/or coagulation factor products required after initial treatment with study drug

Supplemental table 4. Patients meeting each of the three acute major bleeding eligibility criteria (ITT-E population)

| Definition                                                                                                                             | 4F-PCC (N=98) |      | Plasma (N=104) |      |
|----------------------------------------------------------------------------------------------------------------------------------------|---------------|------|----------------|------|
|                                                                                                                                        | n             | %    | n              | %    |
| 1. Life-threatening or potentially life-threatening bleeding                                                                           | 73            | 74.4 | 73             | 70.1 |
| 2. Acute bleeding associated with a fall in hemoglobin level $\geq 2$ g/dL                                                             | 36            | 36.7 | 34             | 29.8 |
| 3. Bleeding requiring blood product transfusion (blood products include plasma, red blood cells and other coagulation factor products) | 71            | 72.4 | 82             | 78.8 |

Supplemental table 5. Length of hospital stay (ITT-E population)

| Parameter                                        | 4F-PCC (N=98) |            | Plasma (N=104) |            |
|--------------------------------------------------|---------------|------------|----------------|------------|
|                                                  | Median        | IQR        | Median         | IQR        |
| Inpatient time (hours)                           | 107.9         | 71.6-151.3 | 101.4          | 67.4-146.9 |
| Emergency department time (hours)                | 4.9           | 0-8.7      | 5.0            | 0-9.4      |
| Intensive care unit / critical care unit (hours) | 0             | 0-44.7     | 0              | 0-40.0     |
| General floor time (hours)                       | 71.1          | 31.1-146.5 | 67.9           | 21.0-136.5 |

Supplemental table 6. Primary rating of hemostatic efficacy by type of major bleeding (ITT-E population)

| Type of bleeding  | Hemostatic efficacy rating | 4F-PCC (N=98) |      | Plasma (N=104) |      | 2-sided p-value* |
|-------------------|----------------------------|---------------|------|----------------|------|------------------|
|                   |                            | n             | %    | n              | %    |                  |
| Gastrointestinal  | Excellent or good          | 41            | 74.5 | 44             | 75.9 | 0.8718           |
|                   | Poor or none               | 14            | 25.5 | 14             | 24.1 |                  |
| Visible           | Excellent or good          | 12            | 75.0 | 12             | 57.1 | 0.2662           |
|                   | Poor or none               | 4             | 25.0 | 9              | 42.9 |                  |
| ICH               | Excellent or good          | 5             | 41.7 | 7              | 58.3 | 0.4241           |
|                   | Poor or none               | 7             | 58.3 | 5              | 41.7 |                  |
| Musculoskeletal   | Excellent or good          | 7             | 100  | 2              | 28.6 | 0.0072           |
|                   | Poor or none               | 0             | 0    | 5              | 71.4 |                  |
| Other non-visible | Excellent or good          | 6             | 75.0 | 3              | 50.0 | 0.3519           |
|                   | Poor or none               | 2             | 25.0 | 3              | 50.0 |                  |

\*Cochran-Mantel-Haenszel

Note: due to the small numbers of patients involved in some categories, it is probable that there was insufficient power to detect differences between groups; 4F-PCC, four-factor prothrombin complex concentrate; ICH, intracranial hemorrhage; N, total number of patients; n, number of patients within subtype group

Supplemental table 7. Hemostatic efficacy by country/region (ITT-E population)

|               |                   | 4F-PCC (N=98) |      | Plasma (N=104) |      | Two-sided p-value         |
|---------------|-------------------|---------------|------|----------------|------|---------------------------|
|               |                   | n             | %    | n              | %    | (Cochran-Mantel-Haenszel) |
| Europe        | Excellent or good | 20            | 66.7 | 22             | 68.8 | 0.86                      |
|               | Poor/none         | 10            | 33.3 | 10             | 31.3 |                           |
| United States | Excellent or good | 51            | 75.0 | 46             | 63.9 | 0.16                      |
|               | Poor/none         | 17            | 25.0 | 26             | 36.1 |                           |

Breslow Day test for 3-way interaction of region by treatment by outcome was 0.343. Results for both regions are not significantly different.



Supplemental table 8. Rapid reduction of INR ( $\leq 1.3$  at 0.5 hours after the end of infusion) by country/region (ITT-E population)

|               |                    | 4F-PCC (N=98) |      | Plasma (N=104) |      | Two-sided p-value         |
|---------------|--------------------|---------------|------|----------------|------|---------------------------|
|               |                    | n             | %    | n              | %    | (Cochran-Mantel-Haenszel) |
| Europe        | Rapid reduction    | 15            | 50.0 | 1              | 3.1  | <0.0001                   |
|               | No rapid reduction | 15            | 50.0 | 31             | 96.9 |                           |
| United States | Rapid reduction    | 46            | 67.6 | 9              | 12.5 | <0.0001                   |
|               | No rapid reduction | 22            | 32.4 | 63             | 87.5 |                           |

Breslow Day test for 3-way interaction of region by treatment by outcome was 0.510. Results for both regions are not significantly different.

Supplemental table 9. Hemostatic efficacy (ITT population)

| Primary rating                          | Number (%) of patients [95% CI] |                     | Difference 4F-PCC – plasma (%) [95% CI] |
|-----------------------------------------|---------------------------------|---------------------|-----------------------------------------|
|                                         | 4F-PCC (N=107)                  | Plasma (N=109)      |                                         |
| Hemostatic efficacy rating by category* |                                 |                     |                                         |
| Excellent                               | 46† (43.0)                      | 46† (42.2)          |                                         |
| Good                                    | 28 (26.2)                       | 26 (23.9)           |                                         |
| Poor/none                               | 33 (30.8)                       | 37 (33.9)           |                                         |
| <i>Non-effective</i>                    | <i>26 (24.3)</i>                | <i>33 (30.3)</i>    |                                         |
| <i>Missing primary rating</i>           | <i>7 (6.5)</i>                  | <i>4 (3.7)</i>      |                                         |
| <b>'Effective' hemostasis</b>           | <b>74 (69.2)</b>                | <b>72 (66.1)</b>    | <b>3.1‡</b>                             |
|                                         | <b>[60.4; 77.9]</b>             | <b>[57.2; 74.9]</b> | <b>[-9.4; 15.6]</b>                     |

\*Hemostatic efficacy assessed by a blinded independent board; †p-value=0.75 by Cochran-Mantel-Haenszel test; ‡4F-PCC non-inferior to plasma;

Effective hemostasis, hemostatic efficacy rated as excellent or good; 4F-PCC, four-factor prothrombin complex concentrate; CI, confidence interval

Supplemental table 10. Rapid INR reduction (ITT population)

|                        | Number (%) of patients [95% CI] |                | Difference 4F-PCC –  |
|------------------------|---------------------------------|----------------|----------------------|
|                        | 4F-PCC (N=107)                  | Plasma (N=109) | plasma (%) [95% CI]† |
| Rapid decrease of INR* | 64 (59.8)                       | 10 (9.2)       | <b>50.6</b>          |
|                        | [50.5; 69.1]                    | [3.8; 14.6]    | <b>[37.9; 63.4]</b>  |

\*INR ≤1.3 at 0.5 h after the end of infusion; †4F-PCC non-inferior to plasma: lower limit of 95% CI >−10%; 4F-PCC superior to plasma: lower limit of 95% CI

>0; 4F-PCC, four-factor prothrombin complex concentrate; CI, confidence interval; N, total number of patients

Supplemental table 11. Number of patients with SAEs by preferred term to Day 45 visit (ITT-S population)

| Preferred term*            | Number (%) of patients |                               |
|----------------------------|------------------------|-------------------------------|
|                            | 4F-PCC (N=103)         | Plasma (N=109)                |
| <b>Any SAE†</b>            | <b>32 (31.1)</b>       | <b>26 (23.9)</b>              |
| Ischemic stroke            | 3 (2.9)                | 0                             |
| Pneumonia                  | 2 (1.9)                | 1 (0.9)                       |
| Respiratory failure        | 2 (1.9)                | 1 (0.9)                       |
| Hemorrhage intracranial    | 2 (1.9)                | 0                             |
| Atrial flutter             | 2 (1.9)                | 0                             |
| Cardiac failure congestive | 1 (1.0)                | 4 (3.7)                       |
| Encephalopathy             | 0                      | 2 (1.8)                       |
| Subarachnoid hemorrhage    | 0                      | 2 (1.8)                       |
| Myocardial ischemia        | 0                      | 2 (1.8)                       |
| Anemia                     | 0                      | 2 (1.8)                       |
| <b>Related SAE‡</b>        | <b>2 (1.9)</b>         | <b>4 (3.7)</b>                |
| Deep vein thrombosis       | 1 (1.0)                | 0                             |
|                            | (Onset day: 13)        |                               |
| Ischemic stroke            | 1 (1.0)                | 0                             |
|                            | (Onset day: 43)        |                               |
| Myocardial ischemia        | 0                      | 2 (1.8)                       |
|                            |                        | (Onset day: 1, both patients) |
| Fluid overload             | 0                      | 1 (0.9)                       |
|                            |                        | (Onset day: 3)                |
| Respiratory failure        | 0                      | 1 (0.9)                       |
|                            |                        | (Onset day: 1)                |

\*Listed in descending order based on frequency in 4F-PCC group and coded according to MedDRA 12.0; multiple SAE entries per patient possible. †SAEs reported for >1 patient per group; ‡Defined as events whose relationship to study treatment was related in the opinion of the investigator

Supplemental table 12. Number of patients with fluid overload or cardiac events (ITT-S population)

| Parameter                                           | 4F-PCC (N=103) |     | Plasma (N=109) |      |
|-----------------------------------------------------|----------------|-----|----------------|------|
|                                                     | n              | %   | n              | %    |
| <b>Any fluid overload or similar cardiac events</b> | 5              | 4.9 | 14             | 12.8 |
| Fluid overload                                      | 0              | 0   | 4              | 3.7  |
| Pulmonary edema                                     | 2              | 1.9 | 4              | 3.7  |
| Cardiac failure                                     |                |     |                |      |
| Cardiac failure congestive                          | 2              | 1.9 | 5              | 4.6  |
| Cardiac failure                                     | 1              | 1.0 | 1              | 0.9  |
| Cardiac failure chronic                             | 0              | 0   | 1              | 0.9  |

Supplemental table 13. Listing of patients who died up to Day 45 (ITT-S population)

| <b>Cause of death (reported term)</b>          | <b>Study day</b> | <b>Age (years)</b> | <b>Comfort care</b> | <b>Relationship to treatment<br/>(as adjudicated by the SAB)</b> |
|------------------------------------------------|------------------|--------------------|---------------------|------------------------------------------------------------------|
| 4F-PCC group (N=10)                            |                  |                    |                     |                                                                  |
| Increased size of intracranial hemorrhage      | 3                | 82                 | Yes                 | Not related                                                      |
| Gradual worsening of cardiogenic heart failure | 5                | 75                 | Yes                 | Not related                                                      |
| Sudden death                                   | 7                | 56                 | No                  | Possibly related                                                 |
| Sepsis (staph infection uncertain etiology)    | 26               | 66                 | Yes                 | Not related                                                      |
| Acute renal failure                            | 19               | 71                 | Yes                 | Not related                                                      |
| Pancreatic cancer                              | 30               | 84                 | Yes                 | Not related                                                      |
| Cardiopulmonary arrest                         | 31               | 54                 | No                  | Not related                                                      |
| Respiratory failure                            | 33               | 79                 | Yes                 | Not related                                                      |
| Stage IV lung cancer                           | 34               | 73                 | Yes                 | Not related                                                      |
| Myocardial infarction                          | 38               | 88                 | Yes                 | Not related                                                      |
| Plasma group (N=5)                             |                  |                    |                     |                                                                  |
| Systemic infection                             | 4                | 89                 | Yes                 | Not related                                                      |
| Worsening metastatic lung cancer               | 7                | 85                 | Yes                 | Not related                                                      |
| Progression of hemorrhagic anemia              | 7                | 80                 | No                  | Not related                                                      |
| Sepsis shock                                   | 14               | 80                 | Yes                 | Not related                                                      |
| Worsening hepatic failure                      | 24               | 72                 | Yes                 | Not related                                                      |

Supplemental table 14. Definitions of non-serious AEs and SAEs

| Event type                  | Definition                                                                                                                                                                                                                                                                                                                                                                                                                                                                                                                                                                                                                                                                                                                                                                                                                                                                                                                                                                                                                                                                                                                                                                                                                                                                                                                                                                                                                                                                   |
|-----------------------------|------------------------------------------------------------------------------------------------------------------------------------------------------------------------------------------------------------------------------------------------------------------------------------------------------------------------------------------------------------------------------------------------------------------------------------------------------------------------------------------------------------------------------------------------------------------------------------------------------------------------------------------------------------------------------------------------------------------------------------------------------------------------------------------------------------------------------------------------------------------------------------------------------------------------------------------------------------------------------------------------------------------------------------------------------------------------------------------------------------------------------------------------------------------------------------------------------------------------------------------------------------------------------------------------------------------------------------------------------------------------------------------------------------------------------------------------------------------------------|
| Serious adverse event (SAE) | <p data-bbox="450 344 2007 517">Any untoward medical occurrence that at any dose: resulted in death; was life-threatening; required in-patient hospitalization or prolongation of existing hospitalization; resulted in persistent or significant disability/incapacity; was a congenital anomaly/birth defect; was according to investigator’s judgment another medically important condition.</p> <p data-bbox="450 560 2007 874">Important medical events that did not result in death, were not life-threatening, or did not require hospitalization could have been considered an SAE when, based upon appropriate medical judgment, they had jeopardized the patient and required medical or surgical intervention to prevent one of the outcomes listed in the definition. Examples of such medical events include allergic bronchospasms requiring intensive treatment in an emergency department (ED) or at home, convulsions that do not result in in-patient hospitalization, or the development of drug dependency or drug abuse.</p> <p data-bbox="450 917 2047 1091">“Life-threatening” meant that the patient was at immediate risk of death from the AE as it occurred. It did not include an AE that, had it occurred in a more severe form, might have caused death. “Requires in-patient hospitalization” was to be defined as hospital admission required for treatment of the AE. Hospital admission for scheduled elective surgery was not an SAE.</p> |
| Non-serious adverse event   | <p data-bbox="450 1137 1379 1161">AEs which did not fulfil the criteria for an SAE were defined as non-serious AEs</p>                                                                                                                                                                                                                                                                                                                                                                                                                                                                                                                                                                                                                                                                                                                                                                                                                                                                                                                                                                                                                                                                                                                                                                                                                                                                                                                                                       |
